# Supplementary material
Source: PubMed Central journal article supplement (PMC7444739)
Supplement: supplementary_material_02212018_bhz109.pdf [file supplementary_material_02212018_bhz109.pdf]

**Supplementary Table 1. Similar Global Brain Volumes in Infants with Monosomic TS and Typically Developing Controls (Sensitivity Analysis 1).**

| Brain Volume | LSMean (SE)<br>TS | LSMean (SE)<br>Control Female | LSMean (SE)<br>Control Male | p_val<br>ANCOVA |
|--------------|-------------------|-------------------------------|-----------------------------|-----------------|
| ICV          | 886401 (20862)    | 925854 (12402)                | 939946 (13665)              | 0.1299          |
| GM           | 609033 (13433)    | 636329 (7986)                 | 639759 (8799)               | 0.1853          |
| WM           | 210907 (6860)     | 220524 (4078)                 | 228265 (4494)               | 0.1064          |
| CSF          | 66460 (2360)      | 69000 (1403)                  | 71922 (1546)                | 0.1225          |

**Supplementary Table 2. Similar Global Brain Volumes in Infants with TS and Typically Developing Controls (Sensitivity Analysis 2, Excluding Children with Mullen Scores < 70).**

| Brain Volume | LSMean (SE)<br>TS | LSMean (SE)<br>Control Female | LSMean (SE)<br>Control Male | p_val<br>ANCOVA |
|--------------|-------------------|-------------------------------|-----------------------------|-----------------|
| ICV          | 898817 (18454)    | 923562 (12069)                | 938455 (13206)              | 0.2451          |
| GM           | 615467 (11811)    | 6350134 (7724)                | 639025 (8452)               | 0.3038          |
| WM           | 215728 (6430)     | 219628 (4205)                 | 227457 (4601)               | 0.2453          |
| CSF          | 67623 (2106)      | 689201 (1377)                 | 71973 (1507)                | 0.1515          |

**Supplementary Table 3. Similar Global Brain Volumes in Infants with TS and Typically Developing Controls (Sensitivity Analysis 3, Excluding Premature Infants).**

| Brain Volume | LSMean (SE)<br>TS | LSMean (SE)<br>Control Female | LSMean (SE)<br>Control Male | p_val<br>ANCOVA |
|--------------|-------------------|-------------------------------|-----------------------------|-----------------|
| ICV          | 891775 (17610.89) | 926509 (11534)                | 933998 (13469)              | 0.1824          |
| GM           | 611421 (11485.27) | 636535 (7522)                 | 637347 (8784)               | 0.1777          |
| WM           | 214491 (5919.63)  | 220857 (3877)                 | 224920 (4527)               | 0.4063          |
| CSF          | 65862 (2019.13)   | 69116 (1322)                  | 71731 (1544)                | 0.0836          |

**Supplementary Table 4. Similar Global Brain Volumes in Infants with TS and Typically Developing Controls (Sensitivity Analysis 4, Additional Covariates).**

| Brain Volume | LSMean (SE)<br>TS | LSMean (SE)<br>Control Female | LSMean (SE)<br>Control Male | p_val<br>ANCOVA |
|--------------|-------------------|-------------------------------|-----------------------------|-----------------|
| ICV          | 911908 (23897)    | 951096 (17297)                | 957891.9 (19339)            | 0.1215          |
| GM           | 628387 (15187)    | 655542.7 (10993)              | 654786 (12290)              | 0.1392          |
| WM           | 216781.5 (8431)   | 225765 (6103)                 | 231057.7 (6823)             | 0.1958          |
| CSF          | 66739 (2756)      | 69788 (1995)                  | 72047.8 (2231)              | 0.1155          |

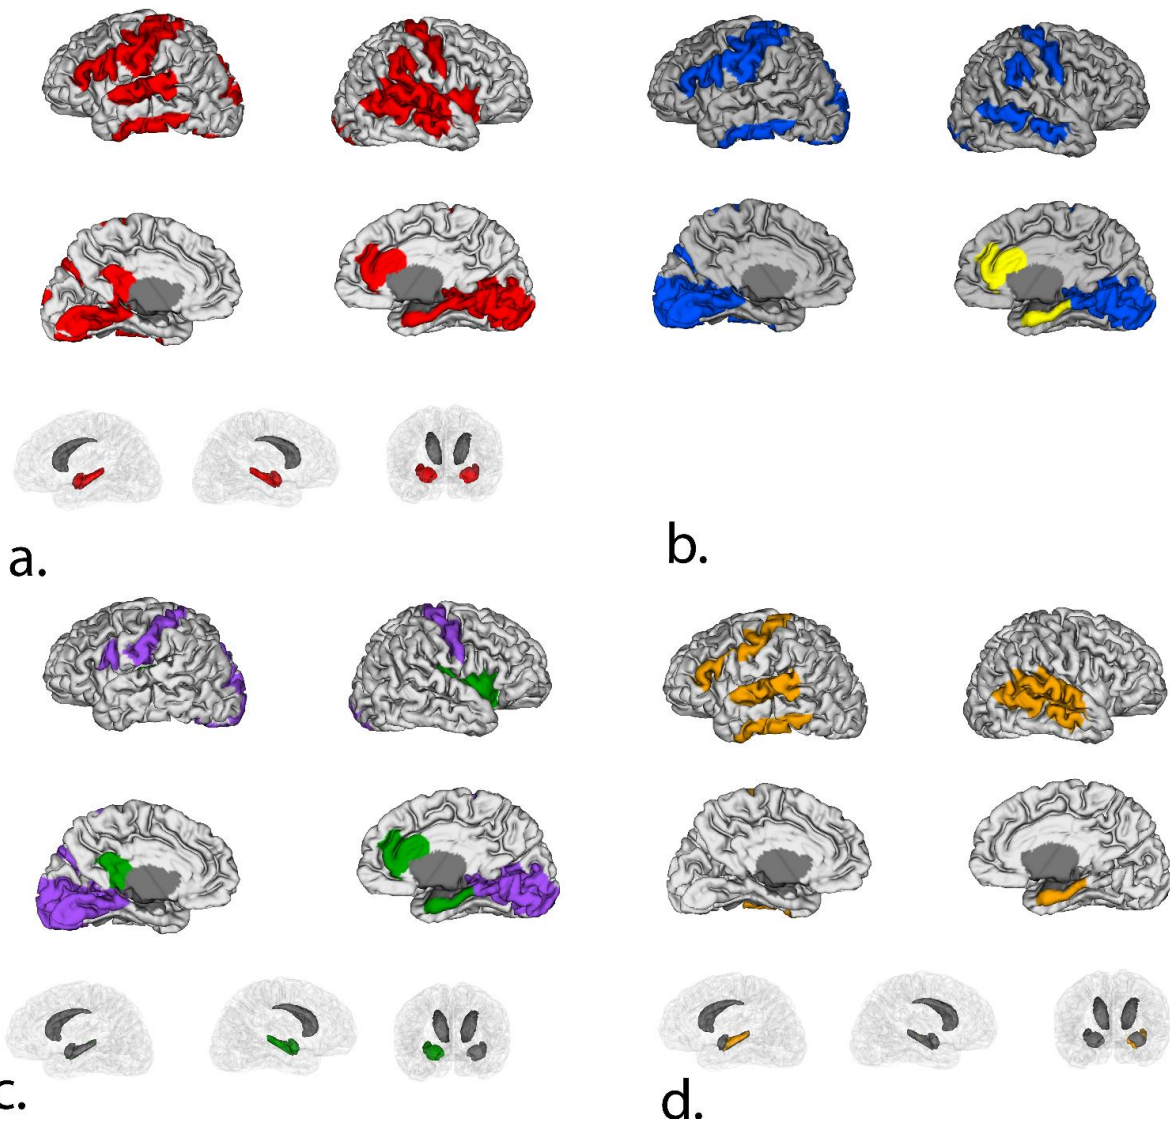

**Supplementary Figure 1: Significant Differences in Regional GM Volumes between Infants with Monosomic TS and Typically Developing Controls (Sensitivity Analysis 1).** Panel a. Results of 3 group ANCOVA on surface reconstruction; regions in red are significant after adjusted FDR correction. Panel b. Results of post-hoc t-tests (TS females versus typical females); blue indicates TS females have significantly smaller volumes than typical females; yellow indicates TS females have significantly larger volumes than typical females. Panel c. Results of post-hoc t-tests (TS females versus typical males); purple indicates TS females have significantly smaller volumes than typical males; green indicates TS females have significantly larger volumes than typical males. Panel d. Results of post-hoc t-tests (typical females versus typical males); orange indicates typical females have significantly larger volumes than typical males.

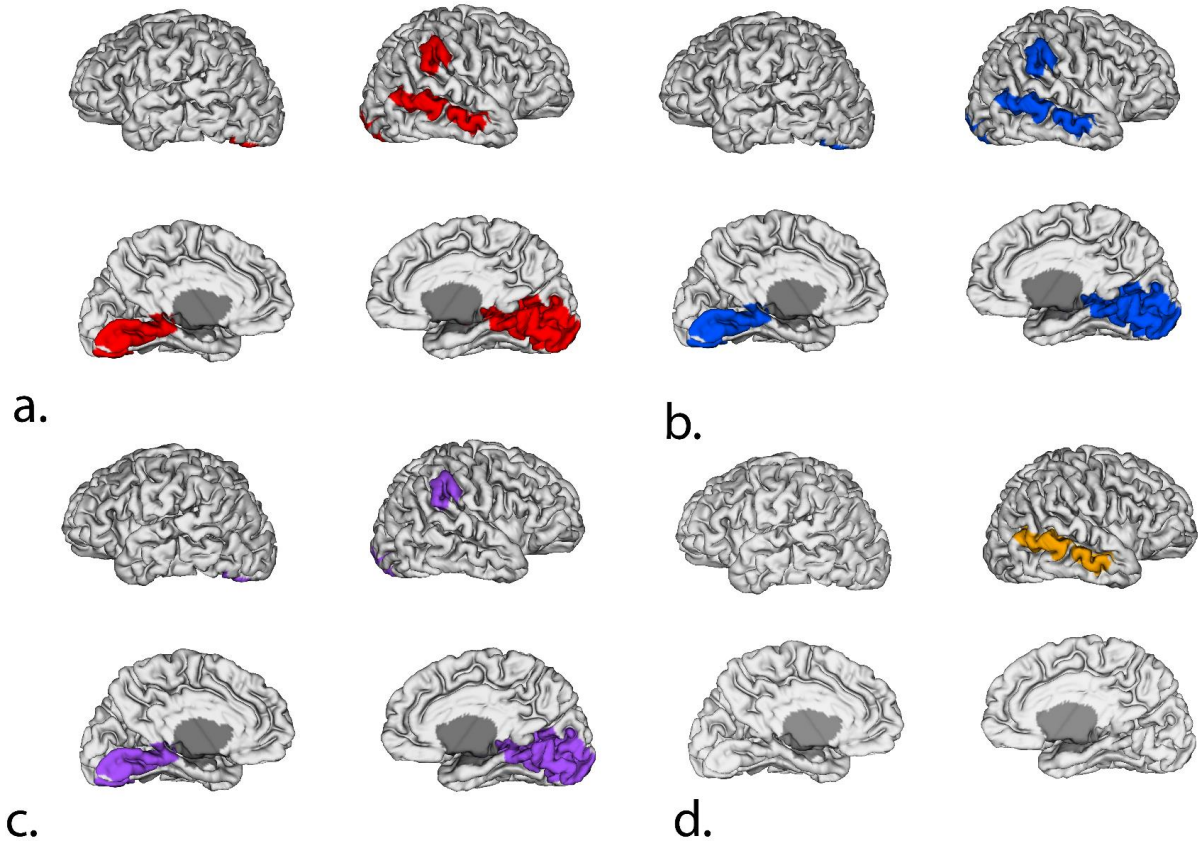

**Supplementary Figure 2: Significant Differences in Regional GM Volumes between Infants with TS and Typically Developing Controls (Sensitivity Analysis 2, Excluding Children with Mullen Scores < 70).** Panel a. Results of 3 group ANCOVA on surface reconstruction; regions in red are significant after adjusted FDR correction. Panel b. Results of post-hoc t-tests (TS females versus typical females); blue indicates TS females have significantly smaller volumes than typical females. Panel c. Results of post-hoc t-tests (TS females versus typical males); purple indicates TS females have significantly smaller volumes than typical males. Panel d. Results of post-hoc t-tests (typical females versus typical males); orange indicates typical females have significantly larger volumes than typical males.

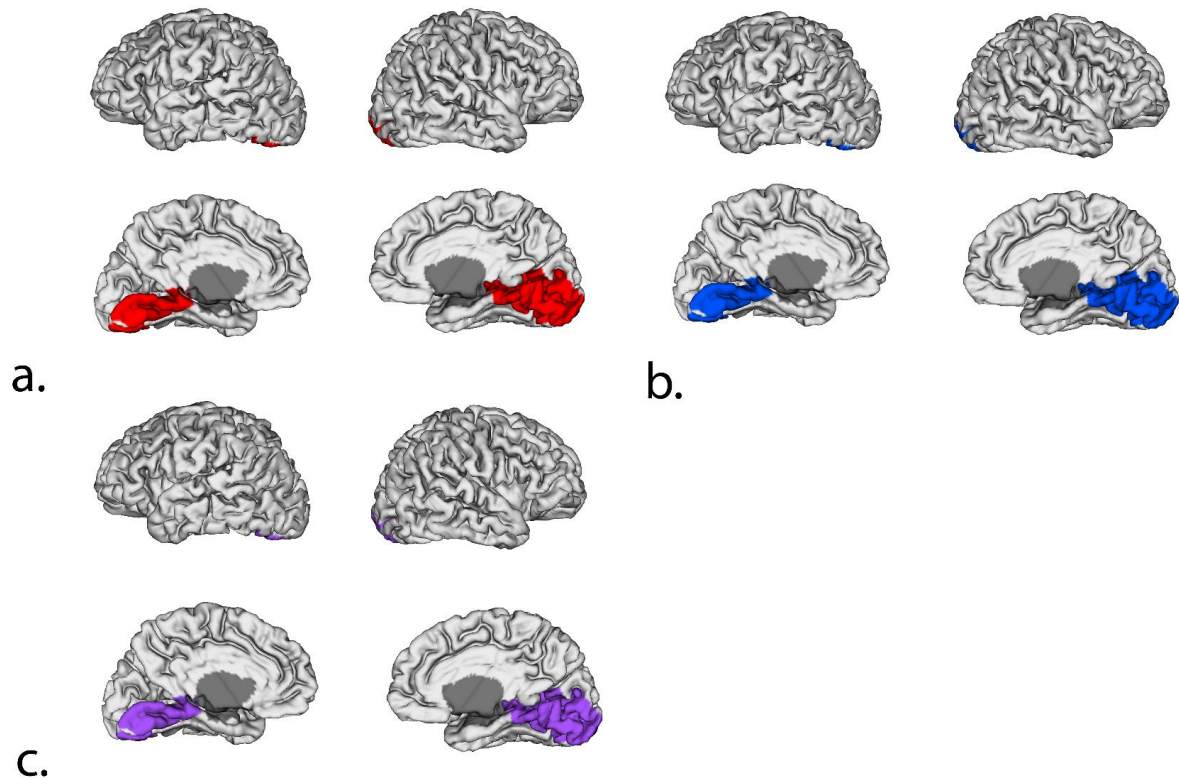

**Supplementary Figure 3: Significant Differences in Regional GM Volumes between Infants with TS and Typically Developing Controls (Sensitivity Analysis 3, Excluding Premature Infants).** Panel a. Results of 3 group ANCOVA on surface reconstruction; regions in red are significant after adjusted FDR correction. Panel b. Results of post-hoc t-tests (TS females versus typical females); blue indicates TS females have significantly smaller volumes than typical females. Panel c. Results of post-hoc t-tests (TS females versus typical males); purple indicates TS females have significantly smaller volumes than typical males.

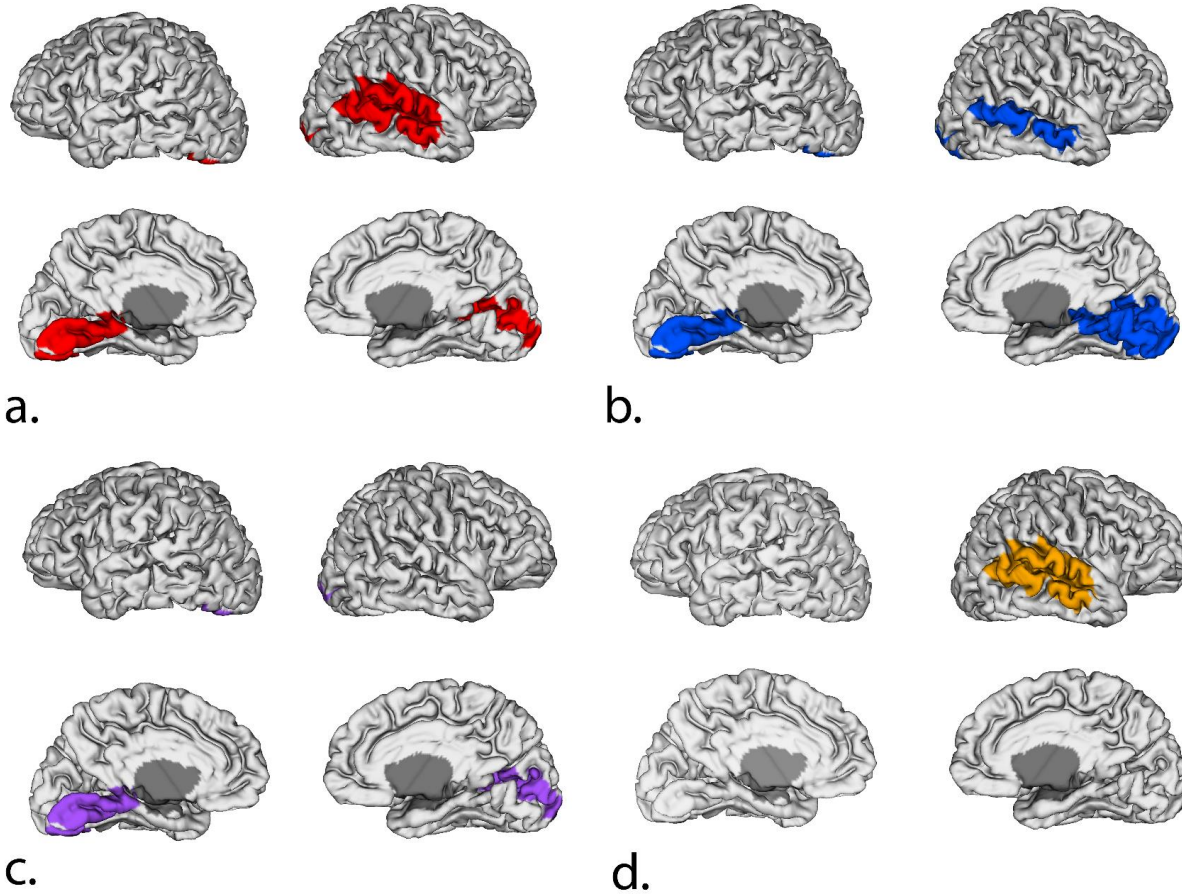

**Supplementary Figure 4: Significant Differences in Regional GM Volumes between Infants with TS and Typically Developing Controls (Sensitivity Analysis 4, Additional Covariates).**

Panel a. Results of 3 group ANCOVA on surface reconstruction; regions in red are significant after adjusted FDR correction. Panel b. Results of post-hoc t-tests (TS females versus typical females); blue indicates TS females have significantly smaller volumes than typical females. Panel c. Results of post-hoc t-tests (TS females versus typical males); purple indicates TS females have significantly smaller volumes than typical males. Panel d. Results of post-hoc t-tests (typical females versus typical males); orange indicates typical females have significantly larger volumes than typical males.
